# Supplementary material for: Combinatorial synthesis and characterization of thin film Al1−xRExN (RE = Pr3+ and Tb3+) heterostructural alloys
Source: Royal Society of Chemistry journal article supplement (doi:10.1039/d4tc02868f), 2024-01-01
Supplement: d4tc02868f2.pdf [file d4tc02868f2.pdf]

## Supplementary Information

### Combinatorial synthesis and characterization of thin film $\text{Al}_{1-x}\text{RE}_x\text{N}$ ( $\text{RE} = \text{Pr}^{3+}$ and $\text{Tb}^{3+}$ ) heterostructural alloys

Binod Paudel,<sup>\*a,b</sup> John S. Mangum,<sup>b</sup> Christopher L. Rom,<sup>b</sup> Kingsley Egbo,<sup>b</sup> Cheng-Wei Lee,<sup>a,b</sup> Harvey Guthrey,<sup>b</sup> Sean Allen,<sup>b</sup> Nancy M. Haegel,<sup>b</sup> Keisuke Yazawa,<sup>a,b</sup> Geoff L. Brennecke<sup>a</sup> and Rebecca W. Smaha<sup>\*b</sup>

<sup>a</sup>Department of Metallurgical and Materials Engineering, Colorado School of Mines, Golden, CO 80401, USA

<sup>b</sup>National Renewable Energy Laboratory, Golden, CO 80401, USA

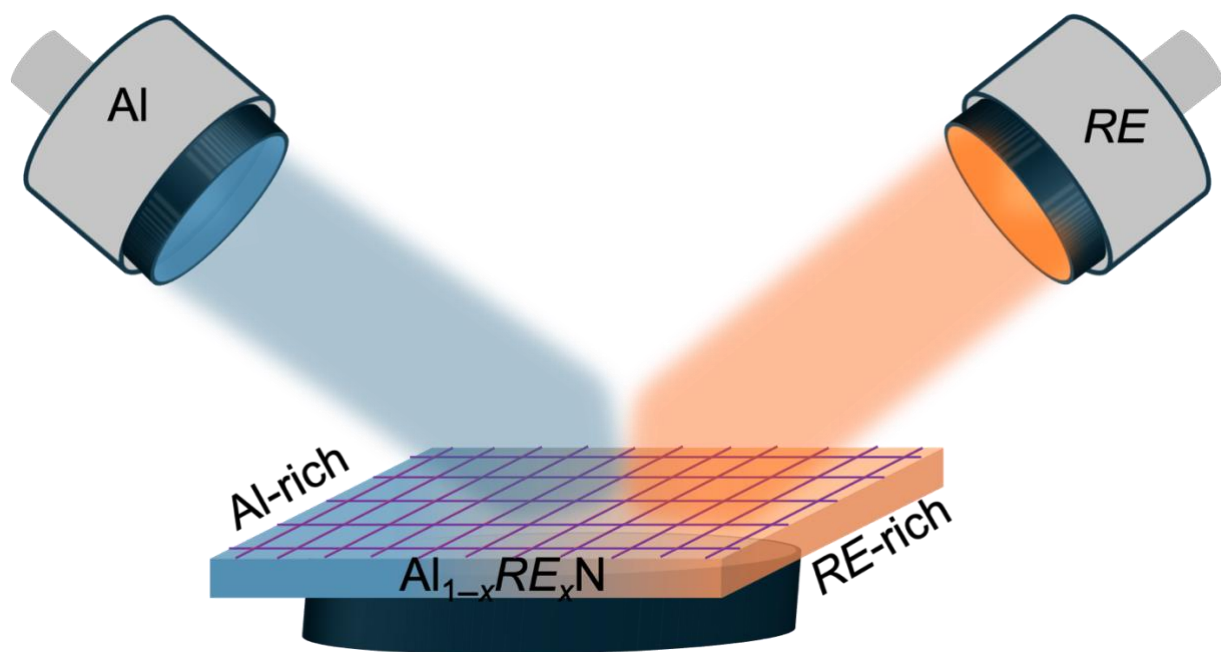

Figure S1: Magnetron sputtering schematic for the high throughput combinatorial synthesis showing a compositional gradient from Al-rich to RE-rich regions of the film.

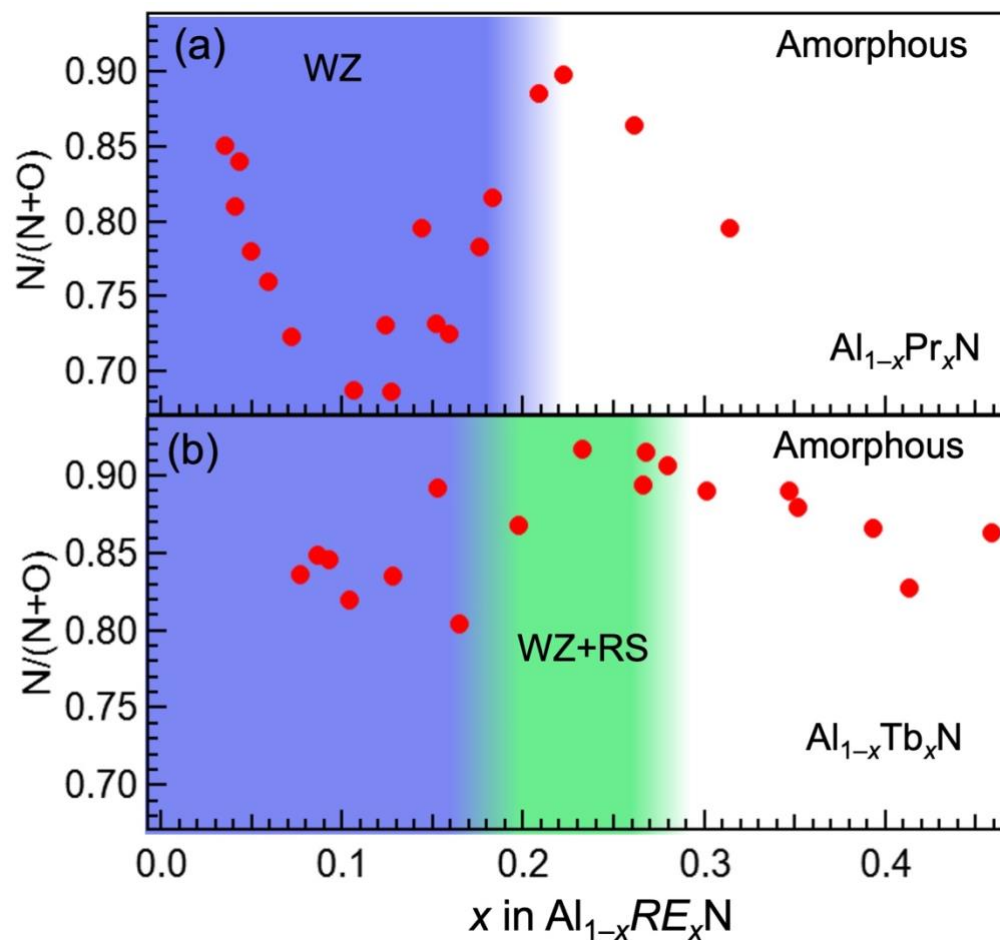

Figure S2: (a,b) Nitrogen composition vs. *RE* composition (*x*) measured with EPMA for (a) Al<sub>1-x</sub>Pr<sub>x</sub>N and (b) Al<sub>1-x</sub>Tb<sub>x</sub>N films across all detected phases.

Table S1: Comparison of overall stoichiometry and nitrogen composition extracted from STEM-EDS and EPMA

|                                                    | EDS (near substrate)                                                              | EDS (surface)                                                                     | EPMA                                                                              |
|----------------------------------------------------|-----------------------------------------------------------------------------------|-----------------------------------------------------------------------------------|-----------------------------------------------------------------------------------|
| Al <sub>0.94</sub> Pr <sub>0.06</sub> N<br>N/(N+O) | Al <sub>0.94</sub> Pr <sub>0.06</sub> N <sub>0.92</sub> O <sub>0.08</sub><br>0.92 | Al <sub>0.94</sub> Pr <sub>0.06</sub> N <sub>0.49</sub> O <sub>0.23</sub><br>0.68 | Al <sub>0.94</sub> Pr <sub>0.06</sub> N <sub>0.98</sub> O <sub>0.30</sub><br>0.76 |
| Al <sub>0.85</sub> Pr <sub>0.15</sub> N<br>N/(N+O) | Al <sub>0.85</sub> Pr <sub>0.27</sub> N <sub>0.87</sub> O <sub>0.05</sub><br>0.94 | Al <sub>0.85</sub> Pr <sub>0.25</sub> N <sub>0.91</sub> O <sub>0.23</sub><br>0.80 | Al <sub>0.86</sub> Pr <sub>0.14</sub> N <sub>0.97</sub> O <sub>0.25</sub><br>0.73 |
| Al <sub>0.92</sub> Tb <sub>0.08</sub> N<br>N/(N+O) | Al <sub>0.91</sub> Tb <sub>0.07</sub> N <sub>0.93</sub> O <sub>0.04</sub><br>0.96 | Al <sub>0.92</sub> Tb <sub>0.07</sub> N <sub>0.8</sub> O <sub>0.15</sub><br>0.84  | Al <sub>0.91</sub> Tb <sub>0.08</sub> N <sub>0.96</sub> O <sub>0.17</sub><br>0.83 |
| Al <sub>0.79</sub> Tb <sub>0.21</sub> N<br>N/(N+O) | Al <sub>0.75</sub> Tb <sub>0.23</sub> N <sub>0.86</sub> O <sub>0.15</sub><br>0.85 | Al <sub>0.76</sub> Tb <sub>0.2</sub> N <sub>0.78</sub> O <sub>0.35</sub><br>0.68  | Al <sub>0.76</sub> Tb <sub>0.23</sub> N <sub>0.97</sub> O <sub>0.09</sub><br>0.90 |

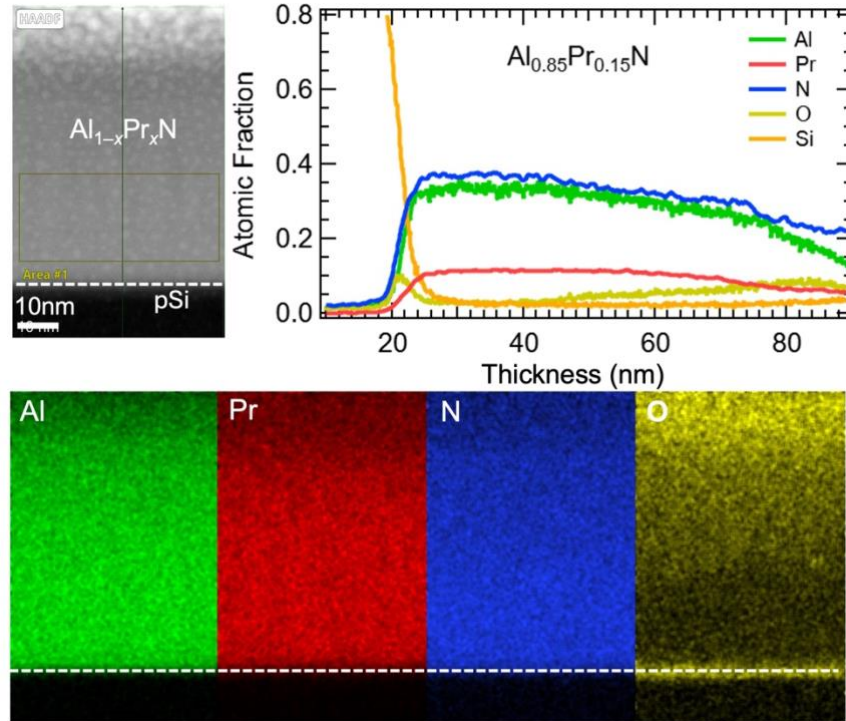

Figure S3: STEM-HAADF image and EDS elemental mapping at the Al *K*-peak, Pr *L*-peak, N *K*-peak, and O *K*-peak for  $\text{Al}_{0.85}\text{Pr}_{0.15}\text{N}$  on a pSi substrate, along with the EDS atomic % line profile.

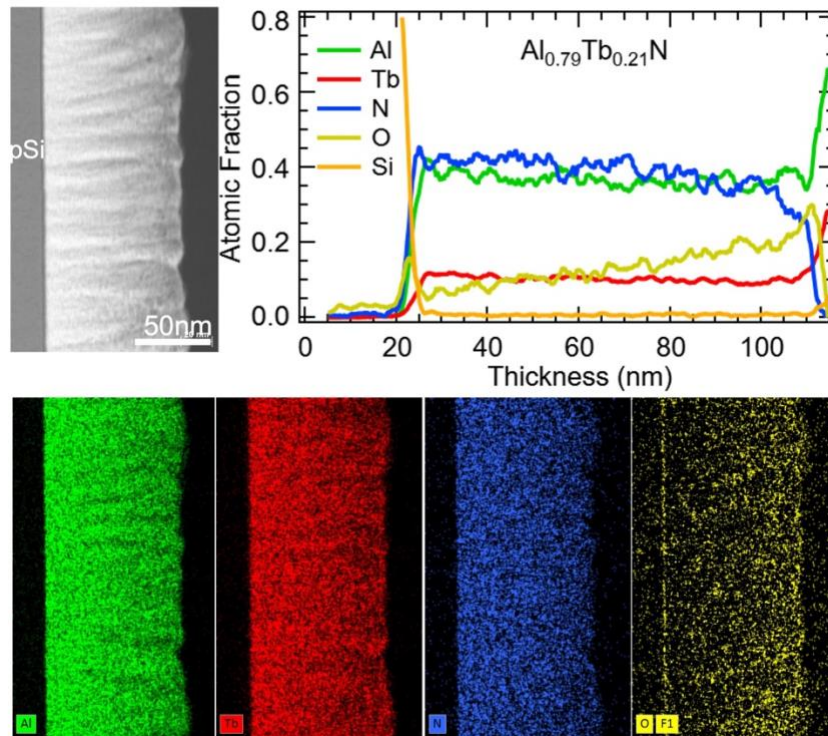

Figure S4: STEM-HAADF image and EDS elemental mapping at the Al *K*-peak, Tb *L*-peak, N *K*-peak, and O *K* peak for  $\text{Al}_{0.79}\text{Tb}_{0.21}\text{N}$  on a pSi substrate, along with the EDS atomic % line profile.

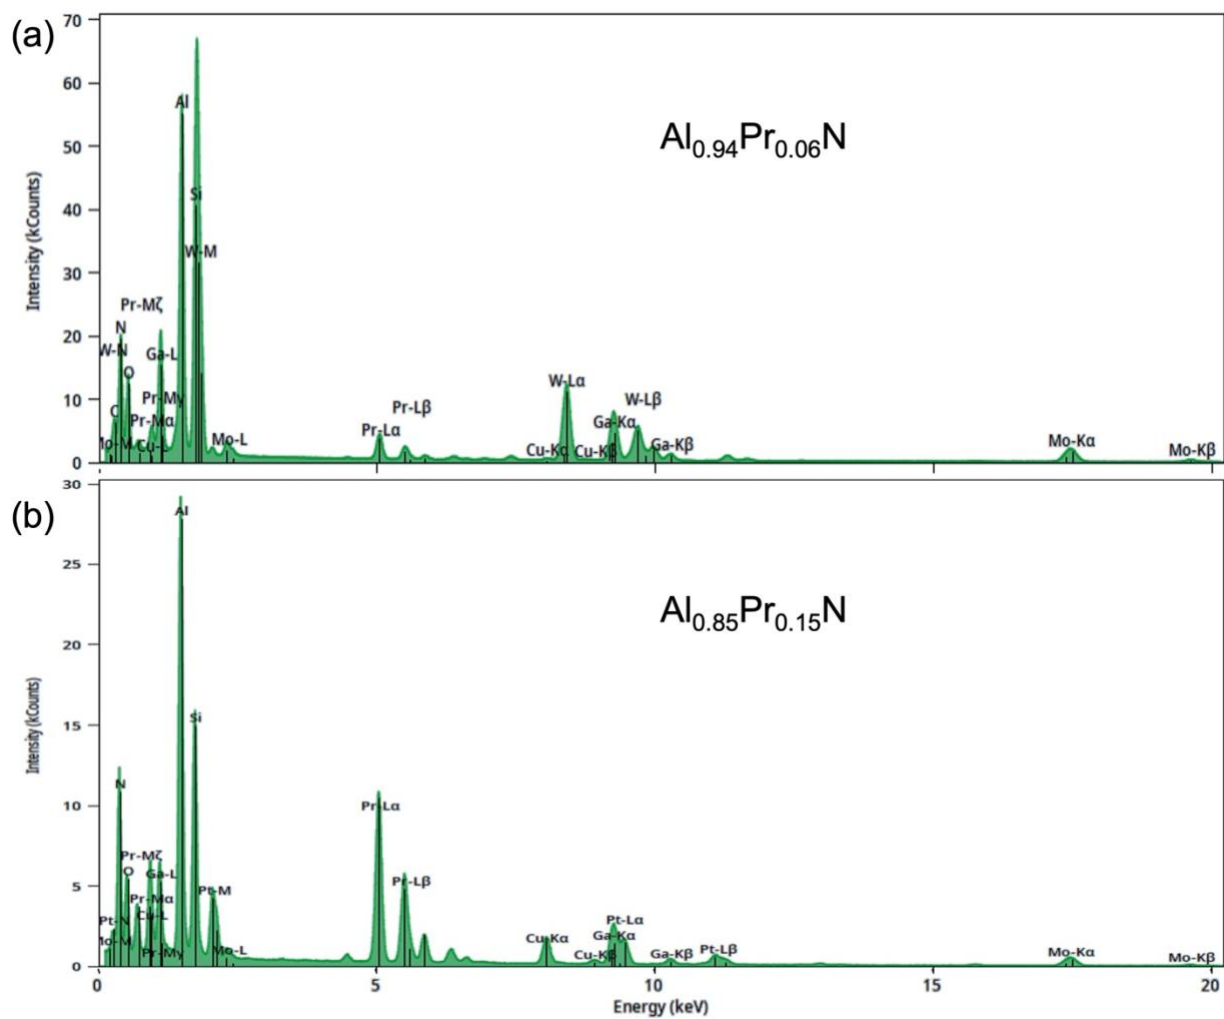

Figure S5: STEM-EDS spectra from (a)  $\text{Al}_{0.94}\text{Pr}_{0.06}\text{N}$  and (b)  $\text{Al}_{0.85}\text{Pr}_{0.15}\text{N}$  films on pSi substrates, collected over the whole map area. The  $\text{Al}_{0.94}\text{Pr}_{0.06}\text{N}$  film was prepared with a W protective layer in the FIB, while Pt was used for the  $\text{Al}_{0.85}\text{Pr}_{0.15}\text{N}$  film. Mo and Cu are extraneous signals from the TEM sample holder and Ga is from the FIB processing.

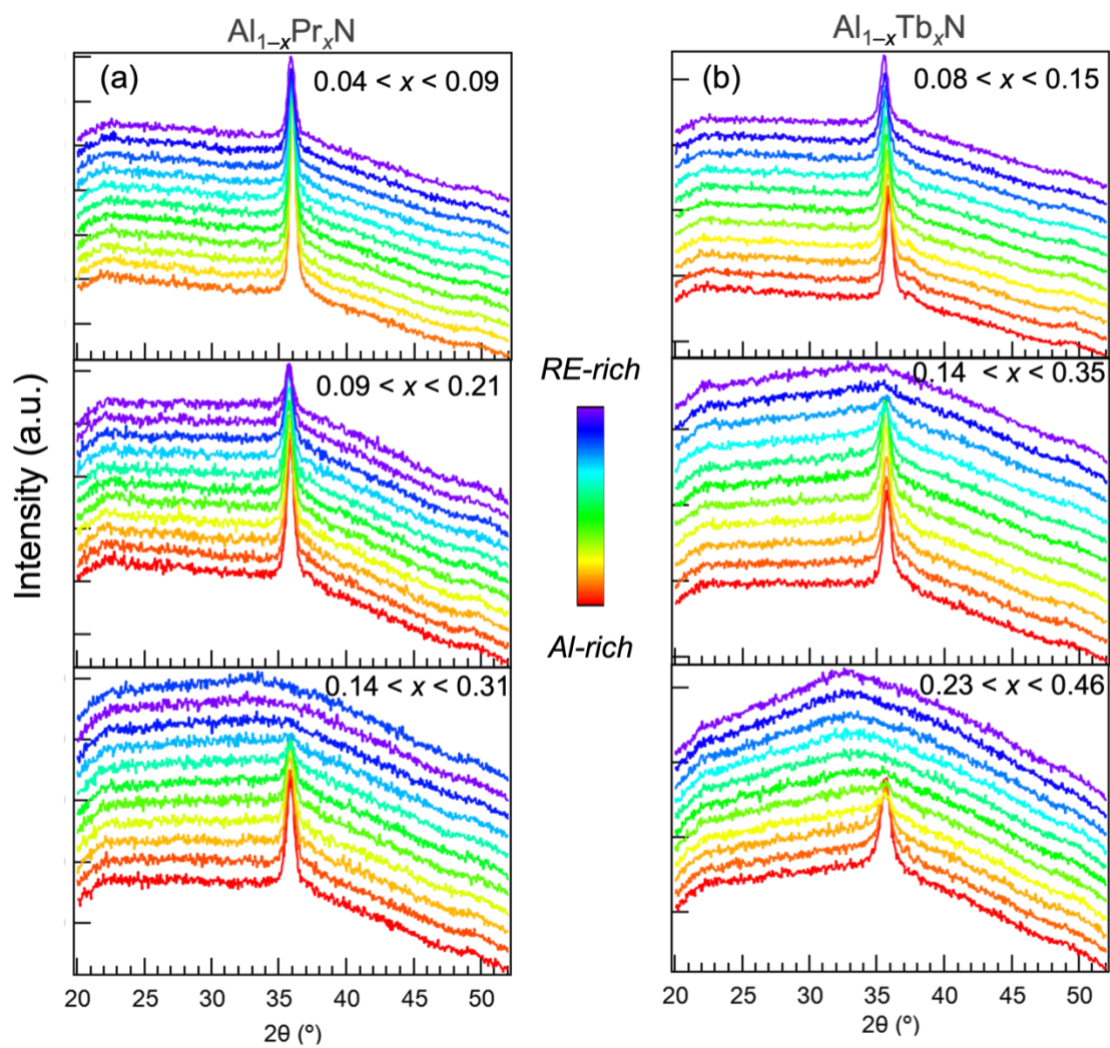

Figure S6: Lab XRD data of (a)  $\text{Al}_{1-x}\text{Pr}_x\text{N}$  films with  $x$  from 0.04 to 0.31 and (b)  $\text{Al}_{1-x}\text{Tb}_x\text{N}$  films with  $x$  from 0.08 to 0.46.



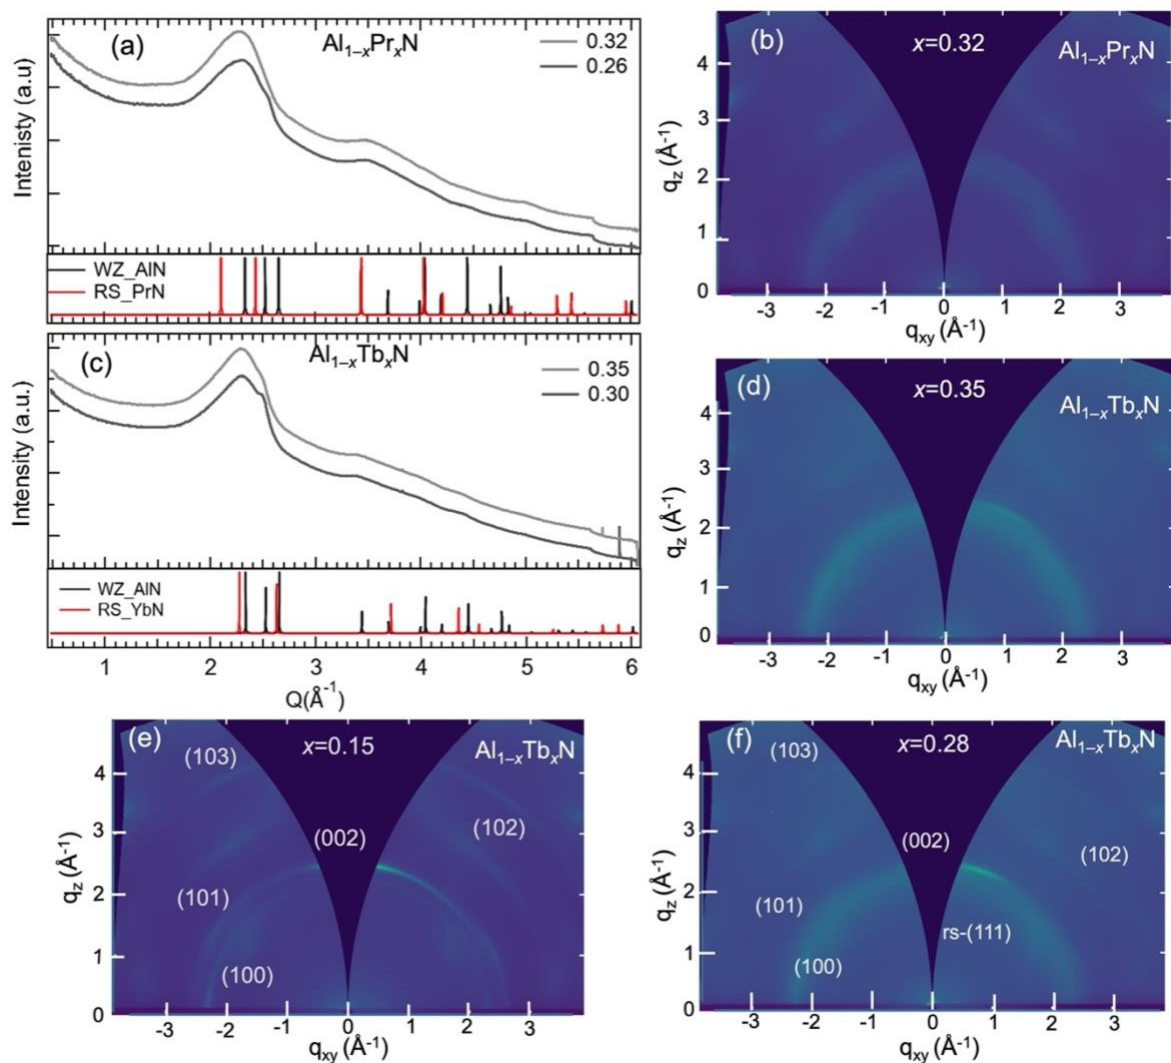

Figure S7: (a,c) Integrated GIWAXS patterns of two amorphous points in (a)  $\text{Al}_{1-x}\text{Pr}_x\text{N}$  and (c)  $\text{Al}_{1-x}\text{Tb}_x\text{N}$ . (b,d) The 2D detector images of one of the amorphous points of (b)  $\text{Al}_{1-x}\text{Pr}_x\text{N}$  ( $x \approx 0.32$ ) and (d)  $\text{Al}_{1-x}\text{Tb}_x\text{N}$  ( $x \approx 0.35$ ). (e,f) Additional 2D detector images of  $\text{Al}_{1-x}\text{Tb}_x\text{N}$  films showing the (e) wz/wz+rs and (f) wz+rs/amorphous boundaries at  $x \approx 0.15$  and  $x \approx 0.28$  respectively.

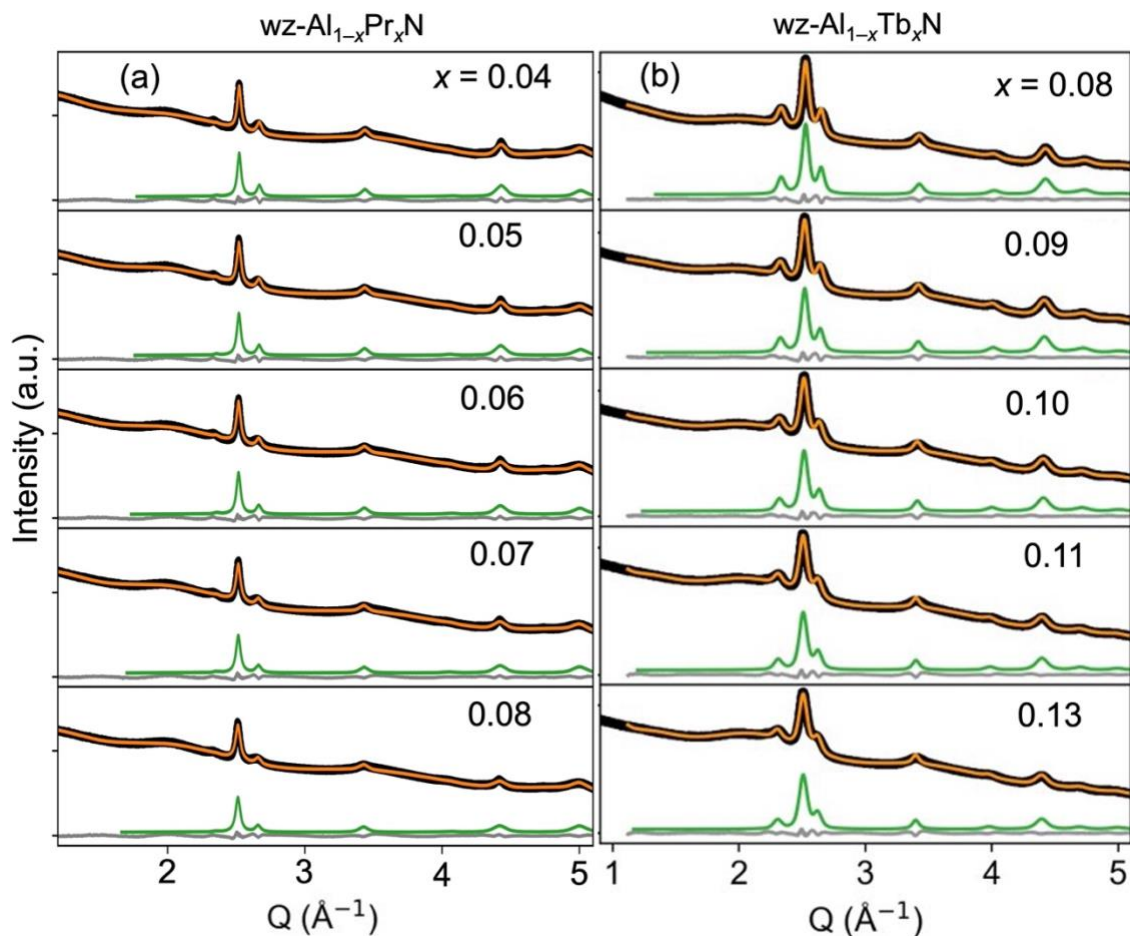

Figure S8: LeBail fits of select GIWAXS data of (a)  $\text{Al}_{1-x}\text{Pr}_x\text{N}$  in a phase-pure wurtzite structure with  $x$  from 0.04 to 0.08, and (b)  $\text{Al}_{1-x}\text{Tb}_x\text{N}$  films in a phase-pure wurtzite structure with up to  $x \approx 0.13$ . Black dots are data, orange traces show overall fit (phase + background), green traces show the fit component from the wz phase, and the gray trace shows the difference between the data and the overall fit.

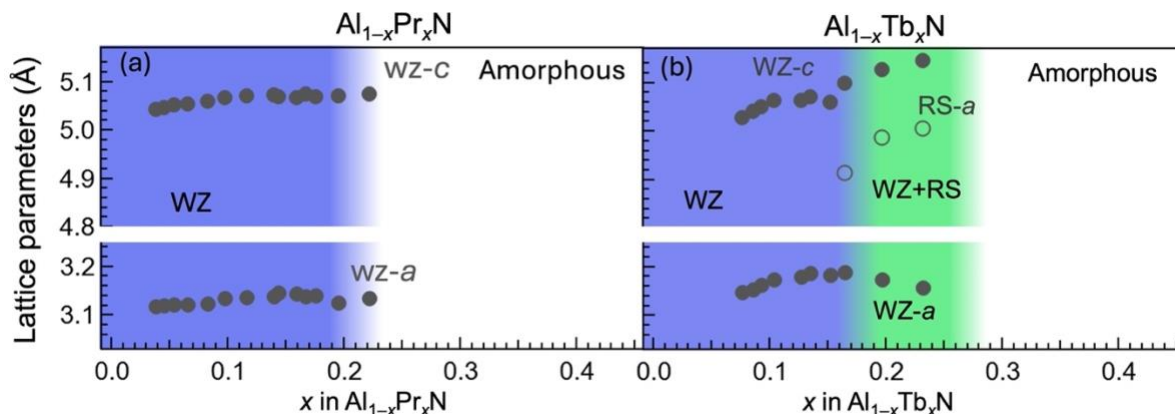

Figure S9: Lattice parameters extracted from LeBail fits of (a)  $\text{Al}_{1-x}\text{Pr}_x\text{N}$  films, and (b)  $\text{Al}_{1-x}\text{Tb}_x\text{N}$  films. In the phase-pure wurtzite regions of  $\text{Al}_{1-x}\text{Pr}_x\text{N}$  (up to  $x \approx 0.22$ ) and  $\text{Al}_{1-x}\text{Tb}_x\text{N}$  (up to  $x \approx 0.14$ ), the wurtzite  $a$  and  $c$  lattice parameters were extracted. In the mixed wz+rs phase region for  $\text{Al}_{1-x}\text{Tb}_x\text{N}$  ( $0.15 \leq x \leq 0.28$ ), both the wurtzite  $a$  and  $c$  lattice parameters and the rocksalt  $a$  lattice parameter were extracted.

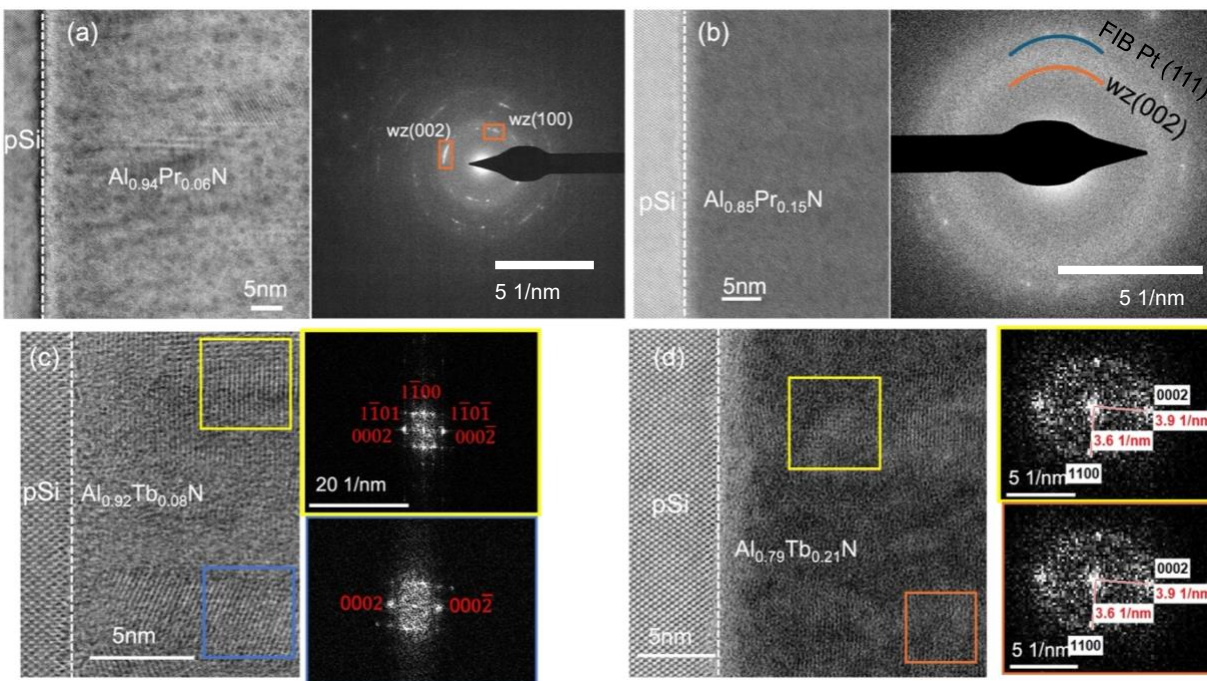

Figure S10: (a,b) STEM-DF images and SAED patterns of  $\text{Al}_{1-x}\text{Pr}_x\text{N}$  with (a)  $x \approx 0.06$  and (b)  $x \approx 0.15$ . For  $x \approx 0.06$ , the SAED shows peaks from the wurtzite phase. For  $x \approx 0.15$ , the SAED shows a diffuse ring that lines up with the (002) d-spacing of the wurtzite phase. The outer ring denoted by the blue arc arises from the nanocrystalline Pt deposited during the FIB process. (c,d) STEM-BF images and fast Fourier transforms (FFTs) at two different regions of each STEM-BF image of  $\text{Al}_{1-x}\text{Tb}_x\text{N}$  with (c)  $x = 0.08$  and (d)  $x = 0.21$ . The FFTs indicate the presence of the wurtzite phase.



Table S2: Reference CL peaks of Pr<sup>3+</sup> compared with those observed in our measurements.

| <b>Transition</b>         | <b>Reference Wavelength (nm)</b> | <b>Observed wavelength (nm)</b> |
|---------------------------|----------------------------------|---------------------------------|
| $^3P_0 \rightarrow ^3H_4$ | 490                              | —                               |
| $^3P_1 \rightarrow ^3H_5$ | 526                              | 527                             |
| $^1D_2 \rightarrow ^3H_4$ | 603                              | —                               |
| $^3P_0 \rightarrow ^3F_2$ | 650                              | 654                             |
| $^3P_1 \rightarrow ^3F_3$ | 673                              | 673                             |
| $^3P_0 \rightarrow ^3F_3$ | 694                              | —                               |
| $^1D_2 \rightarrow ^3H_5$ | 696                              | —                               |

Table S3: Reference CL peaks of Tb<sup>3+</sup> compared with those observed in our measurements.

| <b>Transition</b>         | <b>Reference Wavelength (nm)</b> | <b>Observed wavelength (nm)</b> |
|---------------------------|----------------------------------|---------------------------------|
| $^5D_3 \rightarrow ^7F_6$ | 384                              | —                               |
| $^5D_3 \rightarrow ^7F_5$ | 424                              | —                               |
| $^5D_3 \rightarrow ^7F_4$ | 444                              | —                               |
| $^5D_3 \rightarrow ^7F_3$ | 463                              | —                               |
| $^5D_3 \rightarrow ^7F_2$ | 467                              | —                               |
| $^5D_4 \rightarrow ^7F_6$ | 496                              | 492                             |
| $^5D_4 \rightarrow ^7F_5$ | 551                              | 554                             |
| $^5D_4 \rightarrow ^7F_4$ | 587                              | 589                             |
| $^5D_4 \rightarrow ^7F_3$ | 626                              | 627                             |
| $^5D_4 \rightarrow ^7F_2$ | 660                              | 656                             |
